# Supplementary material for: Cytokine Adsorption During Ex Vivo Blood Perfusion Improves Contractility of Donation After Circulatory Death Hearts
Source: PubMed Central journal article supplement — J Am Heart Assoc. 2024 Nov 22;13(23):e036872. doi: 10.1161/JAHA.124.036872 (PMC11681589; doi:10.1161/jaha.124.036872), 2024-11-22
Supplement: JAH3-13-e036872-s001.pdf [file JAH3-13-e036872-s001.pdf]

# Supplemental Material

## **Data S1.**

### **Supplemental Methods**

#### *Statistics – Network analysis*

We explored the global multivariate patterns by comparing differences across the architectures of the GE networks. The network's nodes are variables confirmed in both statistical and machine-learning steps. The edges between nodes are the absolute values of the Pearson correlation coefficients if the FDR-adjusted  $p$ -values were significant. The graph was computed using the stress-majorization layout<sup>14</sup>. To facilitate the visualization of important nodes, two filters were used: a) the node-degree  $> 2$ , and normalized centrality-betweenness  $> 20\%$ .

**Table S1. Primer for RT-qPCR.**

|                |                        |
|----------------|------------------------|
| <b>HPRT1</b>   |                        |
| Foward         | GGACTTGAATCATGTTTGTG   |
| Reverse        | CAGATGTTTCCAAACTCAAC   |
| <b>GAPDH</b>   |                        |
| Foward         | ACCAGGGCTGCTTTTAACTCTG |
| Reverse        | TTCTCCATGGTCGTGAAGACAC |
| <b>CASP1</b>   |                        |
| Foward         | GCAGAAGCAAGCGTGACAGC   |
| Reverse        | TGGCATCAAAAGCTGCACATAC |
| <b>RAD51B</b>  |                        |
| Foward         | ACTCTGTCGCTTCTGTGGTAA  |
| Reverse        | ACATCAAGATCAGCTCCCAC   |
| <b>FAM104A</b> |                        |
| Foward         | CAAGGCCCGTACTTCCACAT   |
| Reverse        | CACAGAAGGCAAGAAACCGC   |

Figure S1. Troponin kinetics during maintenance perfusion.

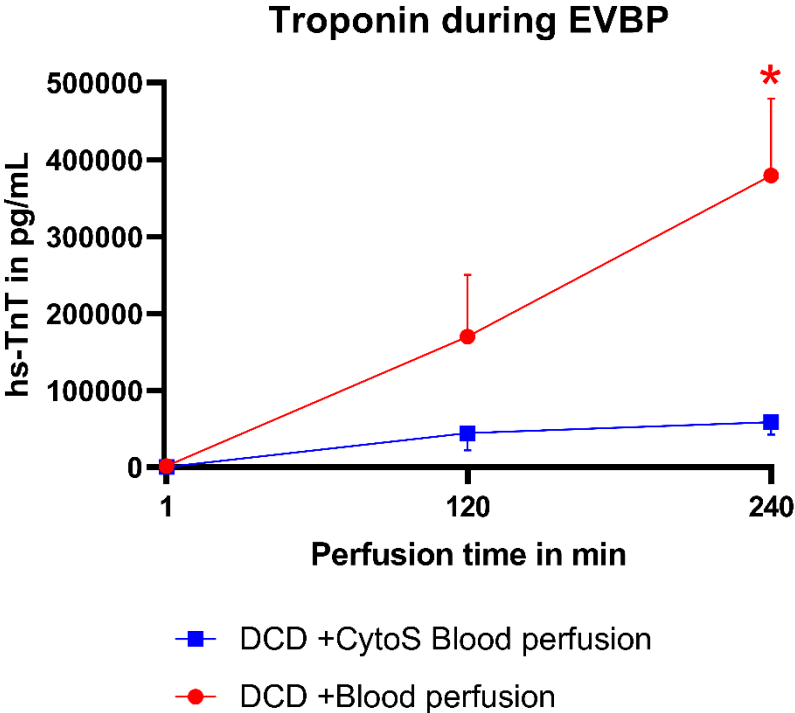

Timepoint 1 and 120 min: Samples of 3-4 pigs per group. Timepoint 240 min: Samples from 8 pigs per group.

**Figure S2. Network analysis.**

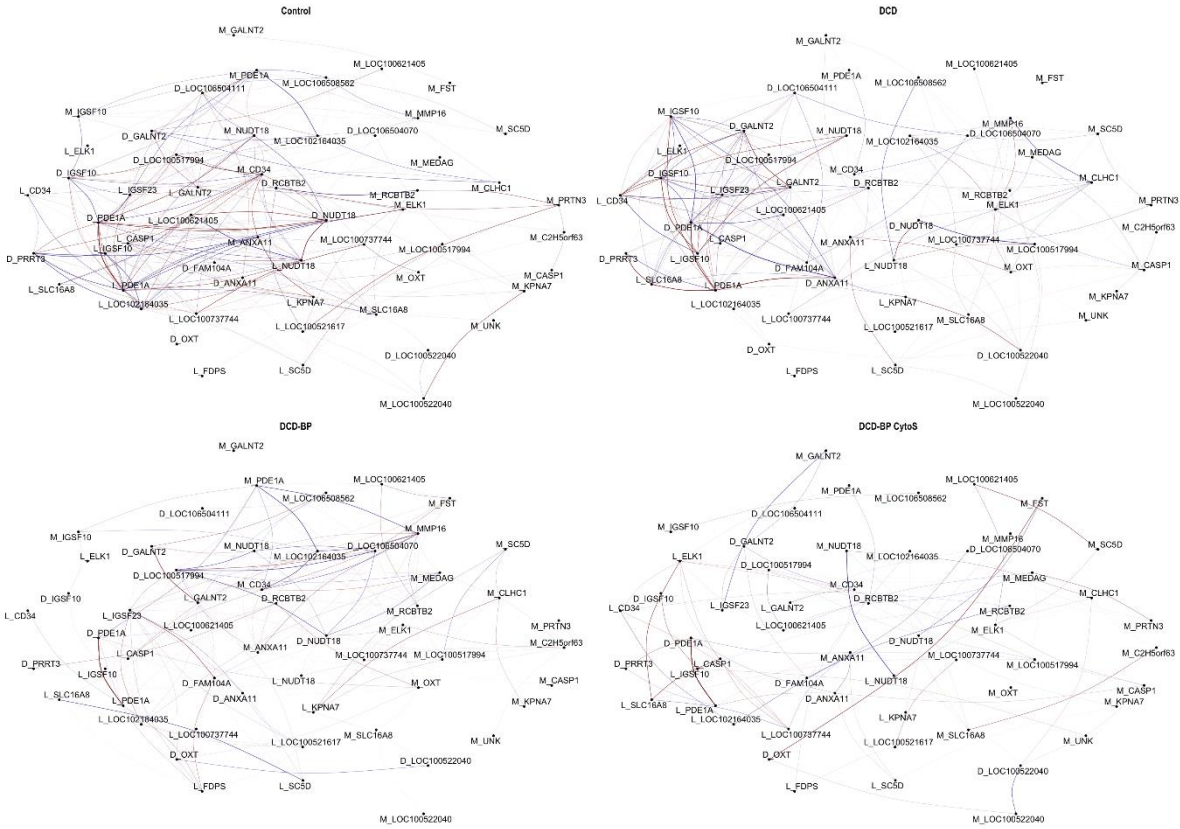

The edges between nodes are the absolute values of the Pearson correlation coefficients if the FDR-adjusted  $p$ -values were significant. To facilitate the visualization of important nodes, two filters<sup>42</sup> were used: a) the node-degree  $> 2$ , and normalized centrality-betweenness  $> 20\%$ . BP: Blood perfusion. CytoS: CytoSorb. DCD: Donation after circulatory death. LAD: Left anterior descending. M, L, and D combined with gene symbols reflect the myocardial expression, LAD expression, or expression difference between both tissues. A positive correlation is shown in blue. A negative correlation is shown in red.

Figure S3. Pathway analysis for tissue comparison.

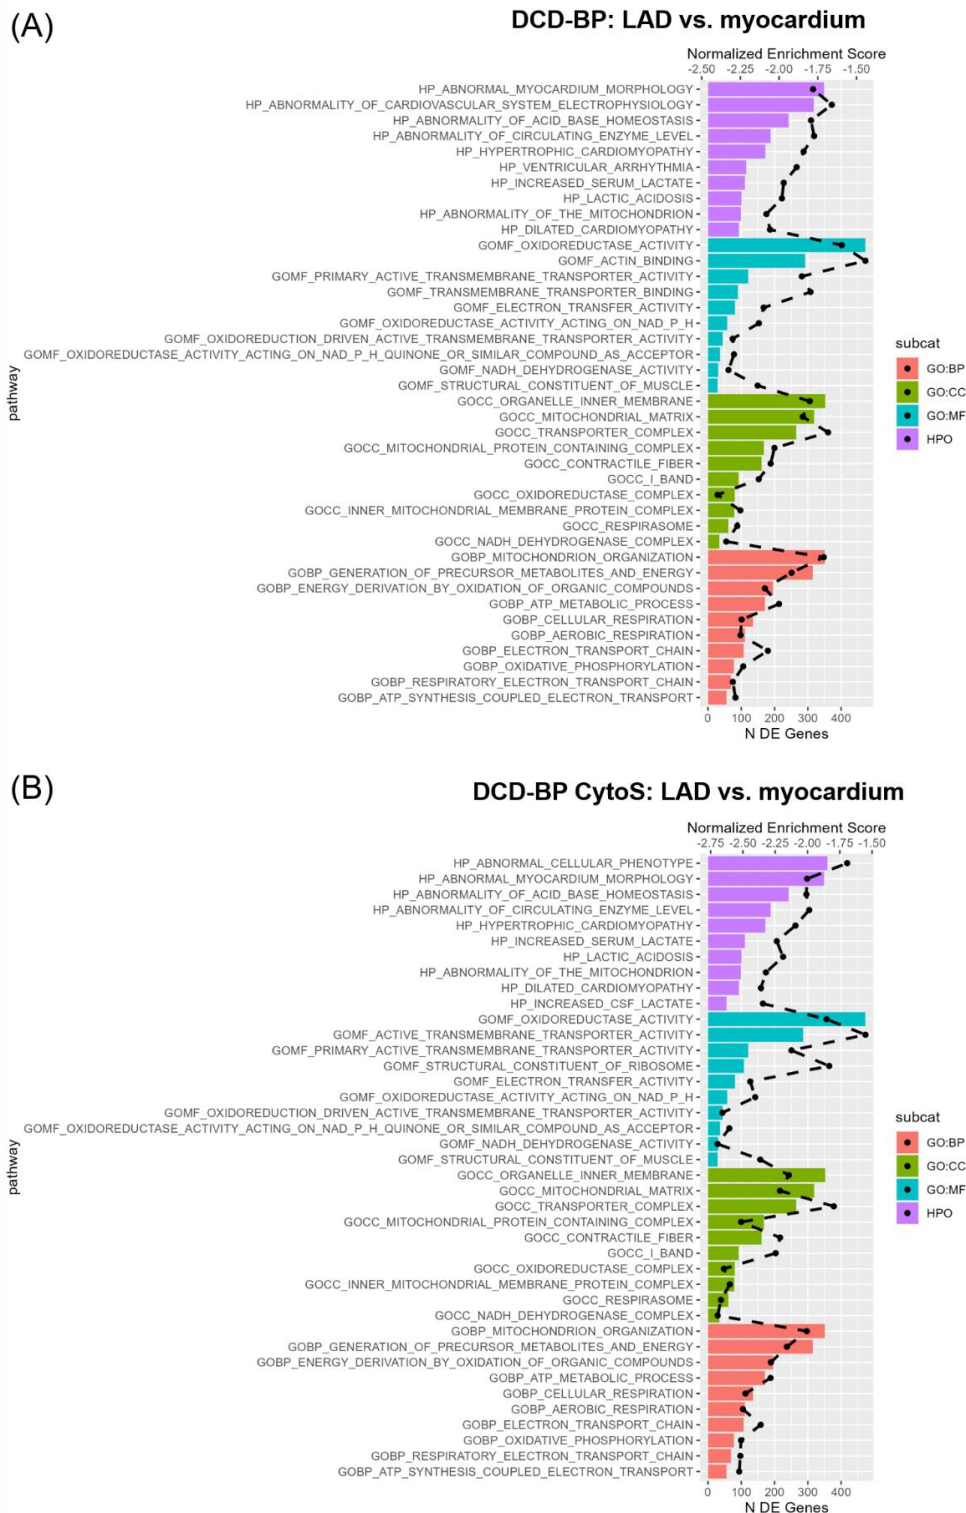

BP: biological process. DE: differentially expressed. CC: cellular component. GO: Gene ontology. HPO: human phenotype ontology. MF: molecular function. The dashed black line represents the normalized enrichment score. All plotted pathways are  $p < 0.05$ .
